# Supplementary material for: Rhodium(iii) and ruthenium(ii) complexes of redox-active, chelating N-heterocyclic carbene/thioether ligands
Source: Royal Society of Chemistry journal article supplement (doi:10.1039/c1nj20224c), 2011-01-01
Supplement: c1nj20224c.pdf [file c1nj20224c.pdf]

Supporting information for

## **Rhodium(III) and ruthenium(II) complexes of redox-active, chelating N-heterocyclic carbene/thioether ligands**

**Agnès Labande,<sup>\*a</sup> Jean-Claude Daran,<sup>a</sup> Nicholas J. Long,<sup>\*b</sup> Andrew J. P. White<sup>b</sup> and Rinaldo Poli<sup>a,c</sup>**

<sup>a</sup> CNRS ; LCC (Laboratoire de Chimie de Coordination) ; 205, route de Narbonne, F-31077 Toulouse, France, and Université de Toulouse ; UPS, INPT ; LCC ; F-31077 Toulouse, France. Fax: +33561553003; Tel: +33561333158; E-mail: agnes.labande@lcc-toulouse.fr.

<sup>b</sup> Department of Chemistry, Imperial College London, London, SW7 2AZ, United Kingdom. Fax: +44 2075945804; Tel: +44 2075945781; E-mail: n.long@imperial.ac.uk.

<sup>c</sup> Institut Universitaire de France, 103, bd Saint-Michel, 75005 Paris, France.

- S1** Square-wave voltammogram of compound **5**.
- S2** Crystal data and structure refinement for compounds **4** and **5**.
- S3** Selected bond lengths and angles for compounds **4** and **5**.

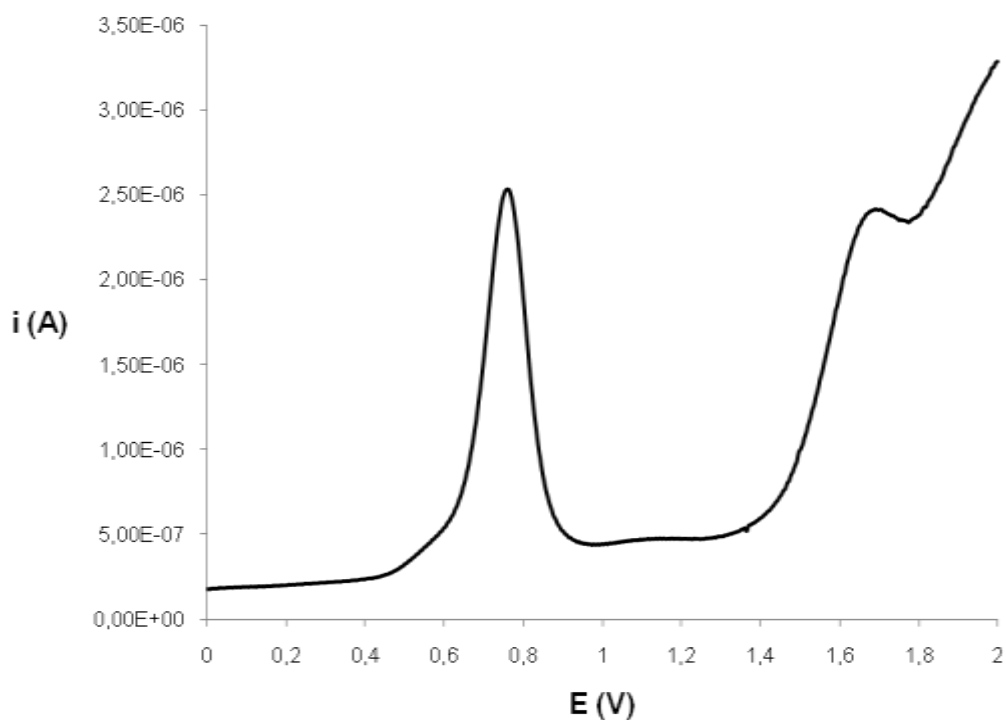

**Figure 1.** Square-wave voltammogram of complex **5**, 1 mM in CH<sub>2</sub>Cl<sub>2</sub> at 20°C ; Frequency : 20 Hz, step potential 5 mV, amplitude 20 mV ; Pt disk working electrode, Pt wire counter electrode, saturated calomel reference electrode ; Supporting electrolyte : *n*Bu<sub>4</sub>BF<sub>4</sub>.

**Table 1.** Crystal data and structure refinement

| Identification code                         | <b>4</b>                                                                                                  | <b>5</b>                                                                |
|---------------------------------------------|-----------------------------------------------------------------------------------------------------------|-------------------------------------------------------------------------|
| Empirical formula                           | C <sub>34</sub> H <sub>41</sub> ClFeN <sub>2</sub> RhS, CH <sub>2</sub> Cl <sub>2</sub> , BF <sub>4</sub> | C <sub>34</sub> H <sub>40</sub> ClFeN <sub>2</sub> RuS, BF <sub>4</sub> |
| Formula weight                              | 875.69                                                                                                    | 787.92                                                                  |
| Temperature, K                              | 173(2) K                                                                                                  | 180(2) K                                                                |
| Wavelength, Å                               | 0.71073 Å                                                                                                 | 0.71073 Å                                                               |
| Crystal system                              | Triclinic                                                                                                 | Monoclinic                                                              |
| Space group                                 | P-1                                                                                                       | P 2 <sub>1</sub> /n                                                     |
| a, Å                                        | 10.6786(2)                                                                                                | 11.8820(3)                                                              |
| b, Å                                        | 11.8064(3)                                                                                                | 10.2423(2)                                                              |
| c, Å                                        | 15.8586(3)                                                                                                | 27.5100(7)                                                              |
| α, °                                        | 96.8086(18)                                                                                               | 90.0                                                                    |
| β, °                                        | 102.4583(19)                                                                                              | 94.493(2)                                                               |
| γ, °                                        | 106.009(2).                                                                                               | 90.0                                                                    |
| Volume, Å <sup>3</sup>                      | 1842.52(7)                                                                                                | 3337.65(14)                                                             |
| Z                                           | 2                                                                                                         | 4                                                                       |
| Density (calculated), Mg/m <sup>3</sup>     | 1.578                                                                                                     | 1.568                                                                   |
| Absorption coefficient, mm <sup>-1</sup>    | 1.164                                                                                                     | 1.080                                                                   |
| F(000)                                      | 892                                                                                                       | 1608                                                                    |
| Crystal size, mm <sup>3</sup>               | 0.38 x 0.30 x 0.10                                                                                        | 0.19 x 0.08 x 0.04                                                      |
| Theta range, °                              | 3.06 to 32.95                                                                                             | 3.53 to 27.48.                                                          |
| Reflections collected                       | 20287                                                                                                     | 37401                                                                   |
| Independent reflections (R <sub>int</sub> ) | 12107 (0.0239)                                                                                            | 7574 (0.0630)                                                           |
| Completeness, %                             | 98.7                                                                                                      | 98.6                                                                    |
| Absorption correction                       | Analytical                                                                                                | Multi-scan                                                              |
| Max. and min. transmission                  | 0.896 and 0.720                                                                                           | 1.0 and 0.934                                                           |
| Refinement method                           | F <sup>2</sup>                                                                                            | F <sup>2</sup>                                                          |
| Data / restraints / parameters              | 12107 / 413 / 484                                                                                         | 7574 / 0 / 412                                                          |
| Goodness-of-fit on F <sup>2</sup>           | 1.074                                                                                                     | 1.071                                                                   |
| R1, wR2 [I>2σ(I)]                           | 0.0331, 0.0810                                                                                            | 0.0512, 0.0970                                                          |
| R1, wR2 (all data)                          | 0.0428, 0.0856                                                                                            | 0.0811, 0.1073                                                          |
| Residual density, e.Å <sup>-3</sup>         | 0.656 / -0.503                                                                                            | 0.694 / -0.712                                                          |

**Table 2.** Selected bond lengths [Å] and angles [°] for complexes **4** and **5**.

| <b>Complex</b> | <b>4 (M = Rh)</b> | <b>5 (M = Ru)</b> |
|----------------|-------------------|-------------------|
| M1-Cg1         | 1.8334(8)         | 1.7460(15)        |
| M1-C11         | 2.3785(4)         | 2.3944(9)         |
| M1-S1          | 2.3622(4)         | 2.3501(10)        |
| M1-C5          | 2.0550(17)        | 2.091(4)          |
| Fe1-Cg2        | 1.6439(10)        | 1.645(2)          |
| Fe1-Cg3        | 1.6485(11)        | 1.648(2)          |
| S1-C2          | 1.822(2)          | 1.798(4)          |
| S1-C18         | 1.7631(19)        | 1.774(4)          |
| C2-C3          | 1.524(3)          | 1.510(6)          |
| C3-N4          | 1.459(2)          | 1.454(6)          |
| N4-C5          | 1.358(2)          | 1.369(5)          |
| C5-N6          | 1.358(2)          | 1.363(5)          |
| N6-C7          | 1.391(2)          | 1.384(5)          |
| N6-C9          | 1.449(2)          | 1.445(5)          |
| C7-C8          | 1.341(3)          | 1.331(7)          |
| C8-N4          | 1.384(2)          | 1.382(5)          |
|                | <b>4 (M = Rh)</b> | <b>5 (M = Ru)</b> |
| Cg1-M1-C11     | 119.92(3)         | 125.09(6)         |
| Cg1-M1-S1      | 123.28(3)         | 119.72(6)         |
| Cg1-M1-C5      | 133.87(6)         | 134.56(12)        |
| C11-M1-S1      | 90.407(16)        | 91.66(4)          |
| C11-M1-C5      | 91.64(5)          | 81.79(11)         |
| S1-M1-C5       | 85.68(5)          | 91.54(12)         |
| Cg2-Fe1-Cg3    | 179.18(5)         | 177.42(12)        |
| M1-C5-N4       | 120.93(12)        | 125.8(3)          |
| M1-C5-N6       | 134.66(13)        | 130.8(3)          |
| N4-C5-N6       | 104.02(14)        | 103.0(3)          |
| S1-C2-C3-N4    | -50.5(2)          | -73.3(4)          |

Cg1 defines the centroid of the cycle above the metal; Cg2 and Cg3 define the centroid of the cyclopentadienyl groups of ferrocene.
